# Supplementary material for: Coexistence of Histologically Confirmed Hashimoto’s Thyroiditis with Different Stages of Papillary Thyroid Carcinoma in a Consecutive Chinese Cohort
Source: Hindawi journal article supplement (doi:10.1155/2014/769294), 2014-01-01
Supplement: f1 [file 769294.f1.pdf]

Supplementary Table 1. Prevalence of PTC (mPTC and crPTC) between Non-HT and HT groups matched by gender and age

|                              | Non-HT<br>(n=5104) | HT<br>(n=1328) | $\chi^2$ | P Value |
|------------------------------|--------------------|----------------|----------|---------|
| All PTC(n=1722)              | 1141(22.4%)        | 581(43.8%)     | 246.051  | <0.01   |
| Female with Age<45y(n=2084)  | 399(26.0%)         | 329(59.7%)     | 202.303  | <0.01   |
| Female with age>=45y(n=2975) | 441(19.2%)         | 206(30.4%)     | 38.479   | <0.01   |
| Male with age<45y(n=481)     | 161(36.7%)         | 30(71.4%)      | 19.339   | <0.01   |
| Male with age>=45y(n=892)    | 140(16.8%)         | 16(28.1%)      | 4.725    | 0.03    |
| mPTC(n=823)                  | 541(10.6%)         | 282(21.2%)     | 106.826  | <0.01   |
| Female with Age<45y(n=2084)  | 169(11.0%)         | 149(27.0%)     | 80.421   | <0.01   |
| Female with age>=45y(n=2975) | 251(10.9%)         | 113(16.7%)     | 16.058   | <0.01   |
| Male with age<45y(n=481)     | 57(13.0%)          | 10(23.8%)      | 3.747    | 0.05    |
| Male with age>=45y(n=892)    | 64(7.7%)           | 10(17.5%)      | 6.845    | <0.01   |
| crPTC(n=899)                 | 600 (11.8%)        | 299(22.4%)     | 101.467  | <0.01   |
| Female with Age<45y(n=2084)  | 230(15.0%)         | 180(32.7%)     | 80.031   | <0.01   |
| Female with age>=45y(n=2975) | 190(8.3%)          | 93(13.7%)      | 18.032   | <0.01   |
| Male with age<45y(n=481)     | 104(23.7%)         | 20(47.6%)      | 11.471   | <0.01   |
| Male with age>=45y(n=892)    | 76(9.1%)           | 6(10.5%)       | 0.130    | 0.72    |

Data are expressed as number (percentage).

2  
3  
4  
5  
6  
7  
8  
9  
10  
11  
12  
13  
14  
15  
16  
17  
18  
19  
20  
21  
22  
23  
24  
25

1

Supplementary Table 2. LNM comparison of different cancer types between Non-HT and HT groups

| LNM                  | Non-HT     | HT         | Total      | $\chi^2$ | <i>P</i> Value |
|----------------------|------------|------------|------------|----------|----------------|
| All thyroid cancer   | 423(31.2%) | 192(30.8%) | 615(31.1%) | 0.035    | 0.85           |
| All-PTC              | 366(32.1%) | 179(30.8%) | 545(31.6%) | 0.286    | 0.59           |
| mPTC                 | 116(21.4%) | 57(20.2%)  | 173(21.0%) | 0.169    | 0.68           |
| crPTC                | 250(41.7%) | 122(40.8%) | 372(41.4%) | 0.061    | 0.80           |
| All microcarcinoma   | 120(21.6%) | 57(20.0%)  | 177(21.0%) | 0.284    | 0.59           |
| FTC                  | 4(4.1%)    | 0(0.0%)    | 4(3.5%)    | 0.769    | 0.38           |
| Medullary Carcinoma  | 10(38.5%)  | 5(62.5%)   | 15(44.1%)  | 1.434    | 0.23           |
| Anaplastic Carcinoma | 1(33.3%)   | 1(100.0%)  | 2(50%)     | 1.333    | 0.25           |
| Other cancer         | 42(48.8%)  | 7(46.7%)   | 49(48.5%)  | 0.024    | 0.88           |

2

Data are expressed as number (percentage).

3

4

5

6

7
